# Supplementary material for: Adverse Reactions after BNT162b2 Messenger RNA Vaccination for Coronavirus Disease 2019 in Healthcare Workers Compared with Influenza Vaccination
Source: MDPI journal article supplement (doi:10.3390/vaccines11020363), 2023-02-05
Supplement: s1 [file s1]

Supplementary Table S1. Adverse reactions according to sex in the BNT162b2 vaccination with inactivated quadrivalent influenza vaccine group.

| <b>Variables</b>       | <b>Total<br/>(n=159)</b> | <b>Male<br/>(n=30)</b> | <b>Female<br/>(n=129)</b> | <b>P-value</b> |
|------------------------|--------------------------|------------------------|---------------------------|----------------|
| Fever                  | 31 (19.5)                | 5 (16.7)               | 26 (20.2)                 | 0.664          |
| Any systemic reactions | 124 (78.0)               | 22 (73.3)              | 102 (79.1)                | 0.491          |
| Headache               | 84 (52.8)                | 13 (43.4)              | 71 (55.)                  | 0.462          |
| Chills                 | 72 (45.3)                | 14 (46.7)              | 58 (45.0)                 | 0.401          |
| Fatigue                | 119 (74.8)               | 21 (70.0)              | 98 (76.0)                 | 0.063          |
| Myalgia                | 123 (77.4)               | 21 (70.0)              | 102 (79.1)                | 0.213          |
| Arthralgia             | 43 (27.0)                | 8 (26.7)               | 35 (27.1)                 | 0.081          |
| Dizziness              | 41 (25.8)                | 5 (16.7)               | 36 (27.9)                 | 0.729          |
| Nausea                 | 28 (17.6)                | 3 (10.0)               | 25 (19.4)                 | 0.265          |
| Vomiting               | 8 (5.0)                  | 1 (3.3)                | 7 (5.4)                   | 0.999          |
| Chest discomfort       | 15 (9.4)                 | 1 (3.3)                | 14 (10.9)                 | 0.306          |
| Abdominal discomfort   | 7 (4.4)                  | 1 (3.3)                | 6 (4.7)                   | 0.999          |
| Diarrhea               | 11 (6.9)                 | 1 (3.0)                | 10 (7.8)                  | 0.692          |
| Anxiety / Depression   | 7 (4.4)                  | 0 (0.0)                | 7 (5.4)                   | 0.348          |
| Any local reactions    | 144 (90.6)               | 26 (86.7)              | 118 (91.5)                | 0.091          |
| Pain                   | 141 (88.7)               | 26 (86.7)              | 115 (89.1)                | 0.213          |
| Redness                | 42 (26.4)                | 8 (26.7)               | 34 (26.4)                 | 0.875          |
| Swelling               | 47 (29.6)                | 9 (30.0)               | 38 (29.5)                 | 0.841          |

All values are presented as n (%).

P-values were calculated using the chi-square or Fisher's exact test.

Supplementary Table S2. Adverse reactions according to sex in the BNT162b2 vaccination alone group.

| <b>Variables</b>       | <b>Total<br/>(n=52)</b> | <b>Male<br/>(n=17)</b> | <b>Female<br/>(n=35)</b> | <b>P-value</b> |
|------------------------|-------------------------|------------------------|--------------------------|----------------|
| Fever                  | 14 (26.9)               | 4 (23.5)               | 10 (28.6)                | 0.123          |
| Any systemic reactions | 42 (80.8)               | 14 (82.4)              | 28 (80.0)                | 0.594          |
| Headache               | 25 (48.1)               | 8 (47.1)               | 18 (48.6)                | 0.307          |
| Chills                 | 24 (46.2)               | 8 (47.1)               | 16 (45.7)                | 0.551          |
| Fatigue                | 41 (78.8)               | 14 (82.4)              | 27 (77.1)                | 0.596          |
| Myalgia                | 42 (80.8)               | 14 (82.4)              | 28 (80.0)                | 0.467          |
| Arthralgia             | 20 (38.5)               | 6 (35.3)               | 14 (40.0)                | 0.248          |
| Dizziness              | 16 (30.8)               | 5 (29.4)               | 11 (31.4)                | 0.331          |
| Nausea                 | 12 (23.1)               | 4 (23.5)               | 8 (22.9)                 | 0.976          |
| Vomiting               | 0 (0.0)                 | 0 (0.0)                | 0                        | NA             |
| Chest discomfort       | 5 (9.6)                 | 2 (11.8)               | 3 (8.6)                  | 0.072          |
| Abdominal discomfort   | 3 (5.8)                 | 1 (5.9)                | 2 (5.7)                  | 0.942          |
| Diarrhea               | 4 (7.7)                 | 1 (5.9)                | 3 (8.6)                  | 0.617          |
| Anxiety / Depression   | 6 (11.5)                | 2 (11.8)               | 4 (11.4)                 | 0.992          |
| Any local reactions    | 47 (90.4)               | 15 (88.2)              | 32 (91.4)                | 0.457          |
| Pain                   | 46 (88.5)               | 15 (88.2)              | 31 (88.6)                | 0.885          |
| Redness                | 12 (23.1)               | 4 (23.5)               | 8 (22.9)                 | 0.864          |
| Swelling               | 13 (25.0)               | 4 (23.5)               | 9 (25.7)                 | 0.757          |

NA, not applicable

All values are presented as n (%).

P-values were calculated using the chi-square or Fisher's exact test.

Supplementary Table S3. Adverse reactions according to sex in the inactivated quadrivalent influenza vaccine alone group.

| <b>Variables</b>       | <b>Total<br/>(n=184)</b> | <b>Male<br/>(n=41)</b> | <b>Female<br/>(n=143)</b> | <b>P-value</b> |
|------------------------|--------------------------|------------------------|---------------------------|----------------|
| Fever                  | 6 (3.3)                  | 1 (2.4)                | 5 (3.5)                   | 0.998          |
| Any systemic reactions | 71 (38.6)                | 14 (34.1)              | 57 (39.9)                 | 0.363          |
| Headache               | 39 (21.2)                | 7 (17.1)               | 32 (22.4)                 | 0.462          |
| Chills                 | 19 (10.3)                | 4 (9.8)                | 15 (10.5)                 | 0.401          |
| Fatigue                | 71 (38.6)                | 14 (34.1)              | 57 (39.9)                 | 0.363          |
| Myalgia                | 61 (33.2)                | 12 (29.3)              | 49 (34.3)                 | 0.151          |
| Arthralgia             | 6 (3.3)                  | 2 (4.9)                | 4 (2.8)                   | 0.218          |
| Dizziness              | 11 (6.0)                 | 2 (4.9)                | 9 (6.3)                   | 0.729          |
| Nausea                 | 6 (3.3)                  | 2 (4.9)                | 4 (2.8)                   | 0.218          |
| Vomiting               | 4 (2.2)                  | 2 (4.9)                | 2 (1.4)                   | 0.135          |
| Chest discomfort       | 5 (2.7)                  | 1 (2.4)                | 4 (2.8)                   | 0.999          |
| Abdominal discomfort   | 2 (1.1)                  | 1 (2.4)                | 1 (0.7)                   | 0.399          |
| Diarrhea               | 7 (3.8)                  | 3 (7.3)                | 4 (2.8)                   | 0.101          |
| Anxiety / Depression   | 4 (2.2)                  | 1 (2.4)                | 3 (2.1)                   | 0.999          |
| Any local reactions    | 71 (38.6)                | 13 (31.7)              | 58 (40.6)                 | 0.097          |
| Pain                   | 69 (37.5)                | 13 (31.7)              | 56 (39.2)                 | 0.645          |
| Redness                | 13 (7.1)                 | 2 (4.9)                | 11 (7.7)                  | 0.128          |
| Swelling               | 23 (12.5)                | 4 (9.8)                | 19 (13.3)                 | 0.225          |

All values are presented as n (%).

P-values were calculated using the chi-square or Fisher's exact test.

Supplementary Table S4. Adverse reactions according to age group in the BNT162b2 vaccination with inactivated quadrivalent influenza vaccine group.

| <b>Variables</b>       | <b>Total<br/>(n=159)</b> | <b>20s<br/>(n=54)</b> | <b>30s<br/>(n=58)</b> | <b>40s<br/>(n=33)</b> | <b>50s<br/>(n=16)</b> | <b>60s<br/>(n=0)</b> | <b>P-value</b> |
|------------------------|--------------------------|-----------------------|-----------------------|-----------------------|-----------------------|----------------------|----------------|
| Fever                  | 31 (19.5)                | 18 (33.3)             | 9 (15.5)              | 3 (9.1)               | 1 (6.3)               | 0 (0.0)              | 0.009          |
| Any systemic reactions | 124 (78.0)               | 43 (79.6)             | 49 (84.5)             | 23 (69.7)             | 9 (56.3)              | 0 (0.0)              | 0.448          |
| Headache               | 84 (52.8)                | 27 (50.0)             | 36 (62.1)             | 17 (51.5)             | 4 (25.0)              | 0 (0.0)              | 0.137          |
| Chills                 | 72 (45.3)                | 26 (48.1)             | 29 (50.0)             | 13 (39.4)             | 4 (25.0)              | 0 (0.0)              | 0.359          |
| Fatigue                | 119 (74.8)               | 40 (74.1)             | 49 (84.5)             | 21 (63.6)             | 9 (56.3)              | 0 (0.0)              | 0.127          |
| Myalgia                | 123 (77.4)               | 43 (79.6)             | 49 (84.5)             | 23 (69.7)             | 8 (50.0)              | 0 (0.0)              | 0.186          |
| Arthralgia             | 43 (27.0)                | 9 (16.7)              | 21 (36.2)             | 10 (30.3)             | 3 (18.8)              | 0 (0.0)              | 0.099          |
| Dizziness              | 41 (25.8)                | 18 (33.)              | 13 (22.4)             | 7 (21.2)              | 3 (18.8)              | 0 (0.0)              | 0.439          |
| Nausea                 | 28 (17.6)                | 5 (9.4)               | 13 (22.4)             | 8 (24.2)              | 2 (12.5)              | 0 (0.0)              | 0.278          |
| Vomiting               | 8 (5.0)                  | 1 (1.9)               | 5 (8.6)               | 2 (6.1)               | 0 (0.0)               | 0 (0.0)              | 0.449          |
| Chest discomfort       | 15 (9.4)                 | 6 (11.1)              | 5 (8.6)               | 1 (3.0)               | 3 (18.8)              | 0 (0.0)              | 0.284          |
| Abdominal discomfort   | 7 (4.4)                  | 3 (5.6)               | 4 (6.9)               | 0 (0.0)               | 0 (0.0)               | 0 (0.0)              | 0.495          |
| Diarrhea               | 11 (6.9)                 | 4 (7.4)               | 4 (6.9)               | 3 (9.1)               | 0 (0.0)               | 0 (0.0)              | 0.816          |
| Anxiety / Depression   | 7 (4.4)                  | 3 (5.6)               | 3 (5.2)               | 1 (3.0)               | 0 (0.0)               | 0 (0.0)              | 0.999          |
| Any local reactions    | 144 (90.6)               | 49 (90.7)             | 53 (91.4)             | 31 (93.9)             | 11 (68.8)             | 0 (0.0)              | 0.788          |
| Pain                   | 141 (88.7)               | 48 (88.9)             | 52 (89.7)             | 31 (93.9)             | 10 (62.5)             | 0 (0.0)              | 0.711          |
| Redness                | 42 (26.4)                | 14 (25.9)             | 18 (31.0)             | 6 (18.2)              | 4 (25.0)              | 0 (0.0)              | 0.859          |
| Swelling               | 47 (29.6)                | 16 (29.6)             | 20 (34.5)             | 8 (24.2)              | 3 (18.8)              | 0 (0.0)              | 0.625          |

All values are presented as n (%).

P-values were calculated using the chi-square or Fisher's exact test.

Supplementary Table S5. Adverse reactions according to age group in the BNT162b2 vaccination group.

| <b>Variables</b>       | <b>Total<br/>(n=52)</b> | <b>20s<br/>(n=10)</b> | <b>30s<br/>(n=19)</b> | <b>40s<br/>(n=15)</b> | <b>50s<br/>(n=8)</b> | <b>60s<br/>(n=0)</b> | <b>P-value</b> |
|------------------------|-------------------------|-----------------------|-----------------------|-----------------------|----------------------|----------------------|----------------|
| Fever                  | 14 (26.9)               | 5 (50.0)              | 6 (31.6)              | 2 (13.3)              | 1 (12.5)             | 0 (0.0)              | 0.059          |
| Any systemic reactions | 42 (80.8)               | 9 (90.0)              | 15 (78.9)             | 12 (80.0)             | 6 (75.0)             | 0 (0.0)              | 0.803          |
| Headache               | 25 (48.1)               | 5 (50.0)              | 10 (52.6)             | 6 (40.0)              | 4 (50.0)             | 0 (0.0)              | 0.356          |
| Chills                 | 24 (46.2)               | 9 (90.0)              | 9 (47.4)              | 6 (40.0)              | 0 (0.0)              | 0 (0.0)              | 0.216          |
| Fatigue                | 41 (78.8)               | 8 (14.8)              | 15 (78.9)             | 12 (80.0)             | 6 (75.0)             | 0 (0.0)              | 0.686          |
| Myalgia                | 42 (80.8)               | 8 (16.7)              | 16 (84.2)             | 12 (80.0)             | 6 (75.0)             | 0 (0.0)              | 0.803          |
| Arthralgia             | 20 (38.5)               | 1 (10.0)              | 4 (21.1)              | 9 (60.0)              | 6 (75.0)             | 0 (0.0)              | 0.001          |
| Dizziness              | 16 (30.8)               | 4 (40.0)              | 5 (26.3)              | 4 (26.7)              | 3 (37.5)             | 0 (0.0)              | 0.357          |
| Nausea                 | 12 (23.1)               | 3 (30.0)              | 4 (21.1)              | 2 (13.3)              | 3 (37.5)             | 0 (0.0)              | 0.128          |
| Vomiting               | 0 (0.0)                 | 0 (0.0)               | 0 (0.0)               | 0 (0.0)               | 0 (0.0)              | 0 (0.0)              | NA             |
| Chest discomfort       | 5 (9.6)                 | 1 (10.0)              | 3 (15.8)              | 1 (6.7)               | 0 (0.0)              | 0 (0.0)              | 0.607          |
| Abdominal discomfort   | 3 (5.8)                 | 0 (0.0)               | 2 (10.5)              | 0 (0.0)               | 1 (12.5)             | 0 (0.0)              | 0.404          |
| Diarrhea               | 4 (7.7)                 | 0 (0.0)               | 3 (15.8)              | 0 (0.0)               | 1 (12.5)             | 0 (0.0)              | 0.308          |
| Anxiety / Depression   | 6 (11.5)                | 2 (20.0)              | 4 (21.1)              | 0 (0.0)               | 0 (0.0)              | 0 (0.0)              | 0.146          |
| Any local reactions    | 47 (90.4)               | 9 (90.0)              | 17 (89.5)             | 14 (93.3)             | 7 (87.5)             | 0 (0.0)              | 0.818          |
| Pain                   | 46 (88.5)               | 9 (90.0)              | 17 (89.5)             | 14 (93.3)             | 6 (75.0)             | 0 (0.0)              | 0.756          |
| Redness                | 12 (23.1)               | 2 (20.0)              | 5 (26.3)              | 4 (26.7)              | 1 (12.5)             | 0 (0.0)              | 0.567          |
| Swelling               | 13 (25.0)               | 2 (20.0)              | 5 (26.3)              | 5 (33.3)              | 1 (12.5)             | 0 (0.0)              | 0.448          |

NA, not applicable

All values are presented as n (%).

P-values were calculated using the chi-square or Fisher's exact test.

Supplementary Table S6. Adverse reactions according to age group in the inactivated quadrivalent influenza vaccine alone group.

| <b>Variables</b>       | <b>Total<br/>(n=184)</b> | <b>20s<br/>(n=74)</b> | <b>30s<br/>(n=60)</b> | <b>40s<br/>(n=35)</b> | <b>50s<br/>(n=13)</b> | <b>60s<br/>(n=2)</b> | <b>P-value</b> |
|------------------------|--------------------------|-----------------------|-----------------------|-----------------------|-----------------------|----------------------|----------------|
| Fever                  | 6 (3.3)                  | 5 (6.8)               | 1 (1.7)               | 0 (0.0)               | 0 (0.0)               | 0 (0.0)              | 0.322          |
| Any systemic reactions | 71 (38.6)                | 29 (39.2)             | 25 (41.7)             | 12 (34.3)             | 5 (38.5)              | 0 (0.0)              | 0.365          |
| Headache               | 39 (21.2)                | 17 (23.0)             | 12 (20.0)             | 7 (20.0)              | 3 (23.1)              | 0 (0.0)              | 0.228          |
| Chills                 | 19 (10.3)                | 8 (10.8)              | 6 (10.0)              | 4 (11.4)              | 1 (7.7)               | 0 (0.0)              | 0.623          |
| Fatigue                | 71 (38.6)                | 29 (39.2)             | 25 (41.7)             | 12 (34.3)             | 5 (38.5)              | 0 (0.0)              | 0.365          |
| Myalgia                | 61 (33.2)                | 25 (33.8)             | 23 (38.3)             | 10 (28.6)             | 3 (23.1)              | 0 (0.0)              | 0.765          |
| Arthralgia             | 6 (3.3)                  | 2 (2.7)               | 2 (3.3)               | 1 (2.9)               | 1 (7.7)               | 0 (0.0)              | 0.624          |
| Dizziness              | 11 (6.0)                 | 6 (8.1)               | 3 (5.0)               | 2 (5.7)               | 0 (0.0)               | 0 (0.0)              | 0.653          |
| Nausea                 | 6 (3.3)                  | 3 (4.1)               | 2 (3.3)               | 1 (2.9)               | 0 (0.0)               | 0 (0.0)              | 0.933          |
| Vomiting               | 4 (2.2)                  | 1 (1.4)               | 2 (3.3)               | 1 (2.9)               | 0 (0.0)               | 0 (0.0)              | 0.768          |
| Chest discomfort       | 5 (2.7)                  | 2 (2.7)               | 2 (3.3)               | 1 (2.9)               | 0 (0.0)               | 0 (0.0)              | 0.999          |
| Abdominal discomfort   | 2 (1.1)                  | 1 (1.4)               | 1 (1.7)               | 0 (0.0)               | 0 (0.0)               | 0 (0.0)              | 0.999          |
| Diarrhea               | 7 (3.8)                  | 4 (5.4)               | 3 (5.0)               | 0 (0.0)               | 0 (0.0)               | 0 (0.0)              | 0.666          |
| Anxiety / Depression   | 4 (2.2)                  | 1 (1.4)               | 1 (1.7)               | 1 (2.9)               | 1 (7.7)               | 0 (0.0)              | 0.361          |
| Any local reactions    | 71 (38.6)                | 29 (39.2)             | 23 (38.3)             | 15 (42.9)             | 4 (30.8)              | 0 (0.0)              | 0.774          |
| Pain                   | 69 (37.5)                | 29 (39.2)             | 23 (38.3)             | 13 (37.1)             | 4 (30.8)              | 0 (0.0)              | 0.655          |
| Redness                | 13 (7.1)                 | 5 (6.8)               | 5 (8.3)               | 2 (5.7)               | 1 (7.7)               | 0 (0.0)              | 0.895          |
| Swelling               | 23 (12.5)                | 9 (12.2)              | 8 (13.3)              | 4 (11.4)              | 2 (15.4)              | 0 (0.0)              | 0.458          |

All values are presented as n (%).

P-values were calculated using the chi-square or Fisher's exact test.
